# Supplementary material for: The proportion of head and neck patients treated at Mulago National Referral Hospital, Kampala-Uganda who need maxillofacial prosthesis from the period of 2010 to 2020
Source: Research Square preprint supplement (doi:10.21203/rs.3.rs-7997758/v1), 2025-12-24
Supplement: Supplementary file 1 [file 90ae8162903d42150121b69f.docx]

Appendix 1

**HEAD AND NECK PATIENT S WHO NEED MAXILLOFACIAL PROSTHESIS**

**QUESTIONNAIRE**

This study aims at determining the proportion of Head and Neck patients treated at Mulago National Referral Hospital, Oral Surgery Department who need Maxillofacial Prosthesis and information will be collected using a guided Questionnaire.

**Instructions:** Tick the appropriate box and fill in the blanks.

Patient study ID: ………………………….

**SECTION 1: SOCIO DEMOGRAPHICS**

1. Age [ ] <20 [ ] 21-30 [ ] 31- 40 [ ] 41-50 [ ] 51- 60 [ ] >61

2. Gender [ ] Male [ ] Female

3. Marital status [ ] Single [ ] Married

4. Occupation [ ] Self-employed [ ] Formally employed [ ] Unemployed

**SECTION 2: MAJOR SURGERY DONE**

1. CONDITION………………………………………………………….

[ ] Acquired [ ] Developmental [ ] Congenital

2. SITE OF DEFECT…………………………………………………….

[ ] Intraoral [ ] Extraoral [ ] Combination of intraoral and extraoral [ ] Cranium

3. SURGICAL PROCEEDURE DONE……………………………………………

**SECTION 3: MAXILLOFACIAL PROSTHETIC CONSIDERATION**

1. TYPE OF PROSTHESIS…………………………………………………….

[ ] Intraoral [ ] Extraoral [ ] Combination of intraoral and extraoral [ ] Cranium

2. Received [ ] Yes [ ] No [ ] Unknown
